# Supplementary material for: Glucocorticoids induce osteonecrosis of the femoral head in rats via PI3K/AKT/FOXO1 signaling pathway
Source: PeerJ. 2022 May 3;10:e13319. doi: 10.7717/peerj.13319 (PMC9074886; doi:10.7717/peerj.13319)
Supplement: Supplemental Information 5 [file peerj-10-13319-s005.xlsx]

## Sheet: Sheet1
Raw datas for statistical analysis
Figure 2A FOXO1expression in GSE10311
ID	FOXO1	Type
GSM260305	6.69842	Normal
GSM260306	6.62232	Normal
GSM260307	6.47713	Normal
GSM260323	7.82	Dex
GSM260324	7.87915	Dex
GSM260325	7.7924	Dex
Normal vs Dex ****P<0.0001
Figure 2B FOXO1expression in GSE21727
ID	FOXO1	Type
GSM542131	10.5645	Normal
GSM542132	10.3076	Normal
GSM542133	10.1632	Normal
GSM542116	12.0567	Dex
GSM542117	12.8395	Dex
GSM542118	12.5389	Dex
Normal vs Dex **P=0.0011
Figure 2C cell viability(%)
Con（uM）	Dex（uM）
0	1	10	100	200	300	400
100	78.6464	73.085	67.6285	60.9129	52.6695	50.6296
100	70.4825	70.5339	63.8604	62.0123	54.2608	52.1561
100	72.0588	69.2191	73.3773	61.1055	53.7018	49.2901
100	74.9871	73.2817	69.8708	58.6563	49.1266	47.6305
Con VS Dex（200uM）		p<0.0001
Con VS Dex（300uM）		p<0.0001
Figure 2D-E		the protein bands were quantified as grayscale value by soft Image J
	Con	Dex		Con	Dex		Con	Dex
FOXO1	63939	110573		57341	129542		57315	133931
GAPDH	170363	184499		172427	190413		144163	162201
FOXO1/GAPDH	0.37531	0.599315		0.332552	0.680321		0.397571	0.82571
cleaved caspase 3	63068	96033		68991	103685		59414	122176
GAPDH	170363	184499		172427	190413		144163	162201
cleaved caspase 3/GAPDH	0.370198	0.520507		0.400117	0.544527		0.412131	0.753238
cleaved caspase 9	30839	170242		78015	205185		14477	129190
GAPDH	170363	184499		172427	190413		144163	162201
cleaved caspase 9/GAPDH	0.181019	0.922726		0.452452	1.07758		0.100421	0.796481
BAX	112479	242481		158512	223156		138226	198437
GAPDH	170363	184499		172427	190413		144163	162201
Bax/GAPDH	0.660231	1.31427		0.919299	1.17196		0.958817	1.2234
Bcl2	187830	123388		140334	81407		174240	74698
GAPDH	170363	184499		172427	190413		144163	162201
Bcl2/GAPDH	1.10253	0.668773		0.813875	0.427529		1.20863	0.460527
		con	con	con		Dex	Dex	Dex		P(Con VS Dex)
FOXO1/GAPDH		0.37531	0.332552	0.397571		0.599315	0.680321	0.82571		0.0084
cleaved caspase 3/GAPDH		0.370198	0.400117	0.412131		0.520507	0.544527	0.753238		0.0474
cleaved caspase 9/GAPDH		0.181019	0.452452	0.100421		0.922726	1.07758	0.796481		0.0068
Bax/GAPDH		0.660231	0.919299	0.958817		1.31427	1.17196	1.2234		0.0189
Bcl2/GAPDH		1.10253	0.813875	1.20863		0.668773	0.427529	0.460527		0.0203
Figure 2F-G
		Con	Con	Con	Dex	Dex	Dex		Con VS Dex
	Apoptosis cells(%)	5.91	8.99	10.67	22.24	21.25	21.39		P=0.0008
Figure 3A-B
		Con	siNC	siRNA1-FOXO1	siRNA2-FOXO1	siRNA3-FOXO1		Con	siNC	siRNA1-FOXO1	siRNA2-FOXO1	siRNA3-FOXO1		Con	siNC	siRNA1-FOXO1	siRNA2-FOXO1	siRNA3-FOXO1
	FOXO1	118901	113893	65720	71275	104775		113941	115936	63249	56513	87889		105082	115173	54576	51461	98254
	GAPDH	167561	128318	157689	159574	128580		141911	153528	143211	118248	143642		150871	170414	141357	174394	140972
	FOXO1/GAPDH	0.709598	0.887584	0.41677	0.446658	0.814862		0.802905	0.755146	0.441649	0.477921	0.611861		0.696502	0.675842	0.386086	0.295085	0.696975
Figure 3A-B
con	siNC	siRNA1-FOXO1	siRNA2-FOXO1	siRNA3-FOXO1						P value
0.709598	0.887584	0.41677	0.446658	0.814862				con VS siRNA1-FOXO1		0.001
0.802905	0.755146	0.441649	0.477921	0.611861				con VS siRNA2-FOXO1		0.0074
0.696502	0.675842	0.386086	0.295085	0.696975				con VS siRNA3-FOXO1		0.6961
Figure 3C-D
Con	Dex	Dex+siRNA2-FOXO1				P value
5.96	21.45	16.56			Con VS Dex	0.0011
10.8	22.86	16.66			Dex VS siRNA2-FOXO1	0.0017
10.01	21.65	14.57			Con VS siRNA2-FOXO1	0.0131
Figure 3E-F
	Con	Dex	Dex+siNC	Dex+siRNA2-FOXO1			Con	Dex	Dex+siNC	Dex+siRNA2-FOXO1			Con	Dex	Dex+siNC	Dex+siRNA2-FOXO1
cleaved caspase 3	55054	93481	76643	63221			44086	79604	80012	59843			49401	89408	100564	68342
GAPDH	100869	125633	135986	107224			138018	120660	128689	139945			138749	99132	158931	153049
cleaved caspase 3/GAPDH	0.545797	0.74408	0.563609	0.589616			0.319422	0.659738	0.621747	0.427618			0.356046	0.901909	0.632753	0.446537
cleaved caspase 9	30064	167619	160741	105067			21892	155546	150234	88762			14095	110439	101527	42070
GAPDH	100869	125633	135986	107224			138018	120660	128689	139945			138749	99132	158931	153049
cleaved caspase 9/GAPDH	0.29805	1.3342	1.18204	0.979883			0.158617	1.28913	1.16742	0.634263			0.101586	1.11406	0.638812	0.274879
BAX	120760	159645	179480	155158			168485	227307	249237	173880			148962	162824	183214	152047
GAPDH	100869	125633	135986	107224			138018	120660	128689	139945			138749	99132	158931	153049
Bax/GAPDH	1.1972	1.27073	1.31984	1.44705			1.22075	1.88386	1.93674	1.24249			1.07361	1.6425	1.15279	0.993453
Bcl2	208276	103428	131597	127053			175700	67639	74060	130749			167890	53429	55105	140285
GAPDH	100869	125633	135986	107224			138018	120660	128689	139945			138749	99132	158931	153049
Bcl2/GAPDH	2.06482	0.823258	0.967725	1.18494			1.27302	0.560575	0.575496	0.934288			1.21003	0.538978	0.346723	0.916607
	Con			Dex			Dex+siNC			Dex+siRNA2-FOXO1
cleaved-caspase3	0.545797	0.319422	0.356046	0.74408	0.659738	0.901909	0.563609	0.621747	0.632753	0.589616	0.427618	0.446537
cleaved-caspase9	0.29805	0.158617	0.101586	1.3342	1.28913	1.11406	1.18204	1.16742	0.638812	0.979883	0.634263	0.274879
Bax	1.1972	1.22075	1.07361	1.27073	1.88386	1.6425	1.31984	1.93674	1.15279	1.44704	1.24249	0.993453
Bcl2	2.06482	1.27302	1.21003	0.823258	0.560575	0.538978	0.967725	0.575496	0.346723	1.18494	0.934288	0.916607
P value	cleaved-caspase3		Con VS Dex	0.0223
			Dex VS Dex+siRNA2-FOXO1	0.0326
	cleaved-caspase9		Con VS Dex	0.0003
			Dex VS Dex+siRNA2-FOXO1	0.0452
	Bax		Con VS Dex	0.0773
			Dex VS Dex+siRNA2-FOXO1	0.1687
	Bcl2		Con VS Dex	0.0434
			Dex VS Dex+siRNA2-FOXO1	0.0421
Figure 4A-B
	Con	Dex	Dex+IGF-1		Con	Dex	Dex+IGF-1		Con	Dex	Dex+IGF-1
PI3K	163435	163610	176824		136014	149269	160667		148671	135460	148093
GAPDH	139994	134157	150119		165750	179266	169766		187435	185911	163610
PI3K/GAPDH	1.16744	1.21954	1.17789		0.820597	0.832668	0.946403		0.793187	0.728628	0.905159
p-PI3K	132220	92936	105794		126424	58739	100961		166135	83839	113473
GAPDH	139994	134157	150119		165750	179266	169766		187435	185911	163610
p-PI3K/GAPDH	0.944469	0.692741	0.704734		0.762739	0.327664	0.594707		0.886361	0.450963	0.693558
AKT	167200	164757	144965		127728	136782	146641		147639	162288	141878
GAPDH	139994	134157	150119		165750	179266	169766		187435	185911	163610
AKT/GAPDH	1.19434	1.22809	0.965667		0.770606	0.763011	0.863783		0.787681	0.872934	0.867172
p-AKT	149144	79438	123539		107083	84599	92929		152463	72093	100254
GAPDH	139994	134157	150119		165750	179266	169766		187435	185911	163610
p-AKT/GAPDH	1.06536	0.592127	0.82294		0.646051	0.471919	0.547395		0.813418	0.387782	0.612762
FOXO1	74638	125057	107278		71352	121380	79801		54428	125610	86948
GAPDH	139994	134157	150119		165750	179266	169766		187435	185911	163610
FOXO1/GAPDH	0.533151	0.932169	0.71462		0.43048	0.677094	0.470065		0.290383	0.675646	0.531435
p-FOXO1	75470	41891	75570		72655	42083	61458		65406	41243	40790
GAPDH	139994	134157	150119		165750	179266	169766		187435	185911	163610
p-FOXO1/GAPDH	0.539101	0.312256	0.503401		0.438341	0.234752	0.362016		0.347035	0.221848	0.249312
	Con	Con	Con		Dex	Dex	Dex		Dex+IGF-1	Dex+IGF-1	Dex+IGF-1
PI3K/GAPDH	1.16744	0.820597	0.793187		1.21954	0.832668	0.728628		1.17789	0.946403	0.905159
p-PI3K/GAPDH	0.944469	0.762739	0.886361		0.592741	0.327664	0.450963		0.704734	0.594707	0.693558
AKT/GAPDH	1.19434	0.770606	0.787681		1.22809	0.763011	0.872934		0.965667	0.863783	0.867172
p-AKT/GAPDH	1.06536	0.646051	0.813418		0.502127	0.471919	0.387782		0.82294	0.647395	0.612762
FOXO1/GAPDH	0.533151	0.43048	0.290383		0.832169	0.677094	0.675646		0.61462	0.470065	0.531435
p-FOXO1/GAPDH	0.539101	0.438341	0.347035		0.312256	0.234752	0.22185		0.463401	0.362016	0.339312
P value	p-PI3K		Con VS Dex	0.0121
			Dex+IGF-1	0.0437
	p-AKT		Con VS Dex	0.0376
			Dex+IGF-1	0.0308
	FOXO1		Con VS Dex	0.0359
			Dex+IGF-1	0.0468
	p-FOXo1		Con VS Dex	0.0409
			Dex+IGF-1	0.0498
Figure 5A-B
	Con	Dex	Dex+IGF-1		Con	Dex	Dex+IGF-1		Con	Dex	Dex+IGF-1
Nuclear FOXO1	38574	73915	41532		37691	73904	42836		30966	68942	37824
H3	196764	170601	171104		173836	172609	203080		197303	199931	200002
Nuclear FOXO1/H3	0.196042	0.433262	0.24273		0.216819	0.428158	0.210932		0.156946	0.344829	0.189118
	Con	Con	Con	Dex	Dex	Dex	Dex+IGF-1	Dex+IGF-1	Dex+IGF-1
Nuclear FOXO1/H3	0.196042	0.216819	0.156946	0.433262	0.428158	0.344829	0.24273	0.210932	0.189118
		P value
H3	Con VS Dex	0.0032
	Dex VS Dex+IGF-1	0.0045
Figure 6B					Figure 6D					Figure 6F
	Normal	MPS	IGF-1+MPS			Normal	MPS	IGF-1+MPS			Normal	MPS	IGF-1+MPS
	4.54	46.6	20			5	51	25			7.5	27.1	16.9
	5.55	39.2	14.6			8	48	33			4.68	26.9	15.7
	3.25	43.3	12.4			3	40	28			6.97	30	18.3
			P value					P value					P value
		Normal VS MPS	<0.0001				Normal VS MPS	0.0003				Normal VS MPS	<0.0001
		MPS VS IGF-1+MPS	0.0003				MPS VS IGF-1+MPS	0.0118				MPS VS IGF-1+MPS	0.0009
